# Supplementary material for: Agonism of Prostaglandin E2 Receptor 4 Ameliorates Tubulointerstitial Injury in Nephrotoxic Serum Nephritis in Mice
Source: J Clin Med. 2021 Feb 18;10(4):832. doi: 10.3390/jcm10040832 (PMC7922874; doi:10.3390/jcm10040832)
Supplement: Supplementary file 1 [file jcm-10-00832-s001.pdf]

# Supplementary Materials

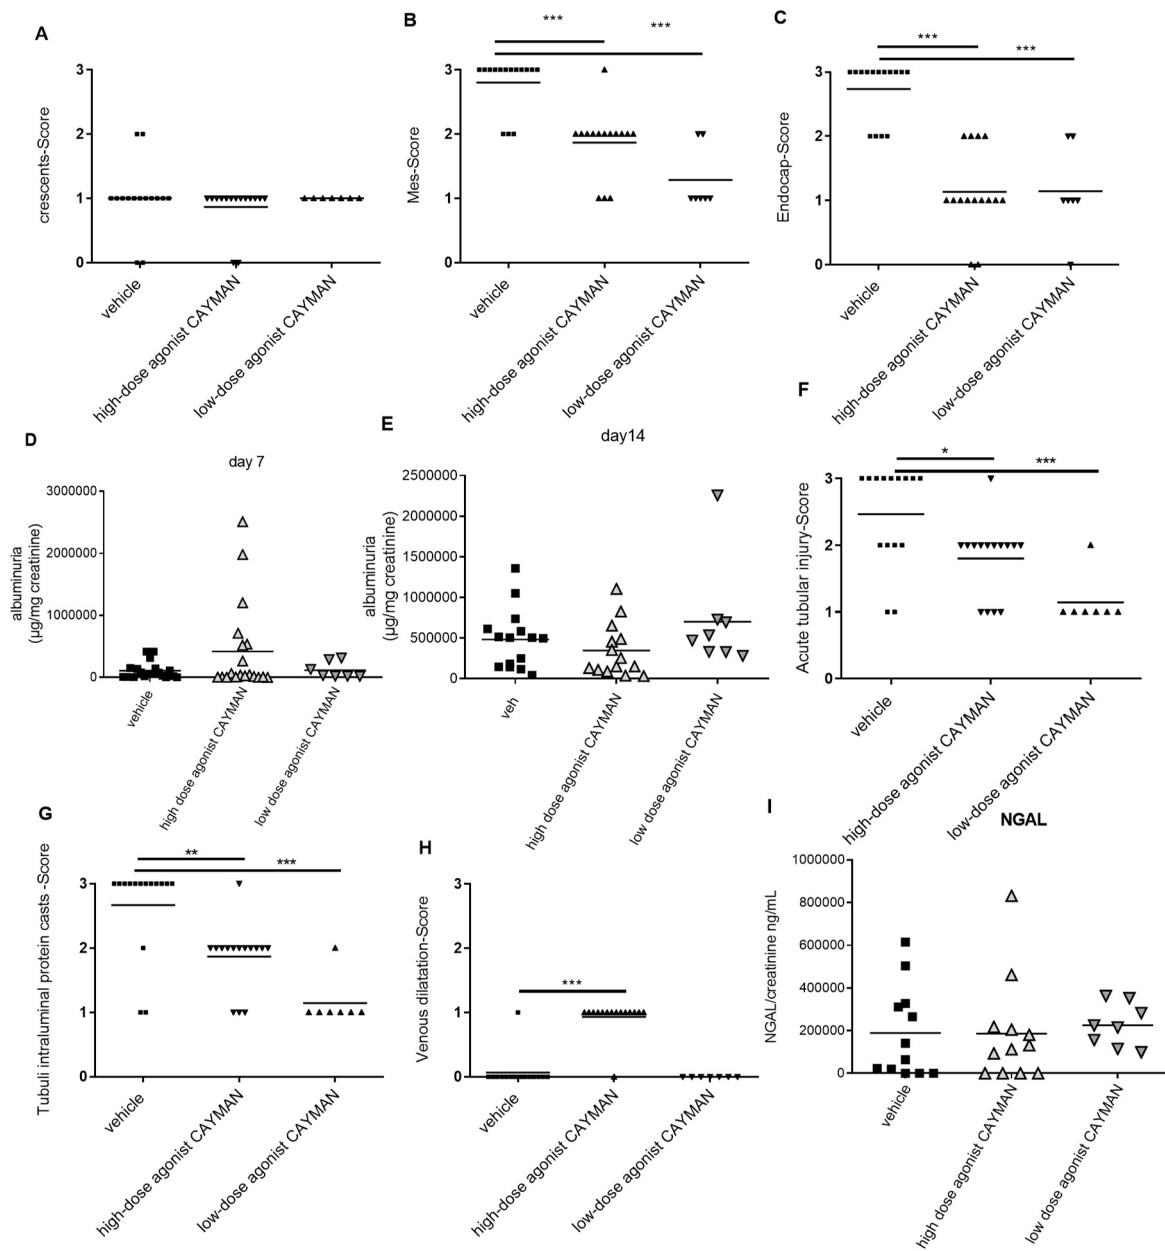

**Figure S1.** EP4 receptor agonism improves the phenotype of NTS. Fourteen days after NTS induction kidneys of mice treated with vehicle, high-dose EP4 receptor agonist (25 µg/mouse/day) or low-dose EP4 receptor agonist (7 µg/mouse/day; Cayman Chemicals, L-902,688) were harvested and stained kidney sections were quantified for glomerular and kidney damage (A–C). Urine samples collected on day 7 (D) and 14 (E) were analyzed for albumin and creatinine. In order to quantify for tubular damage acute tubular injury score (F) and tubular cast formation per 6 high power field (HPF) (G) were evaluated. Venous dilatation score (H) was quantified and serum NGAL levels (I) were evaluated on day 14. (\* $p \leq 0.05$ , \*\* $p \leq 0.01$ , \*\*\* $p \leq 0.001$ ).

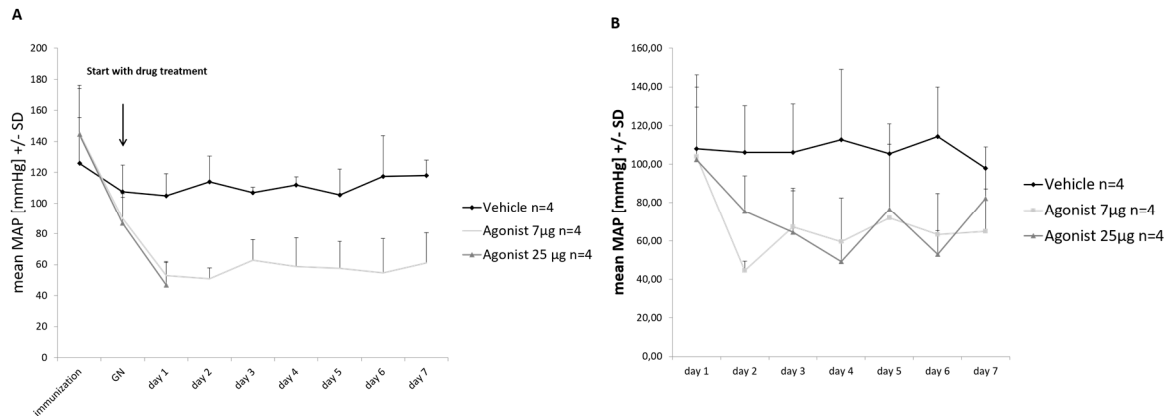

**Figure S2.** Hypotensive episodes occur after EP4 receptor agonist (Cayman Chemicals, L-902,688) administration. Blood pressure was assessed in vehicle ( $n = 4$ ), EP4 receptor high-dose agonist ( $n = 4$ ) and EP4 receptor low-dose agonist ( $n = 4$ ) treated mice after NTS induction. Blood pressure was measured via the tail cuff method immediately (**A**) and 30 min after EP4 agonist injection (**B**) in all 3 groups. Mean arterial pressure (MAP) is represented as mean  $\pm$  SEM.

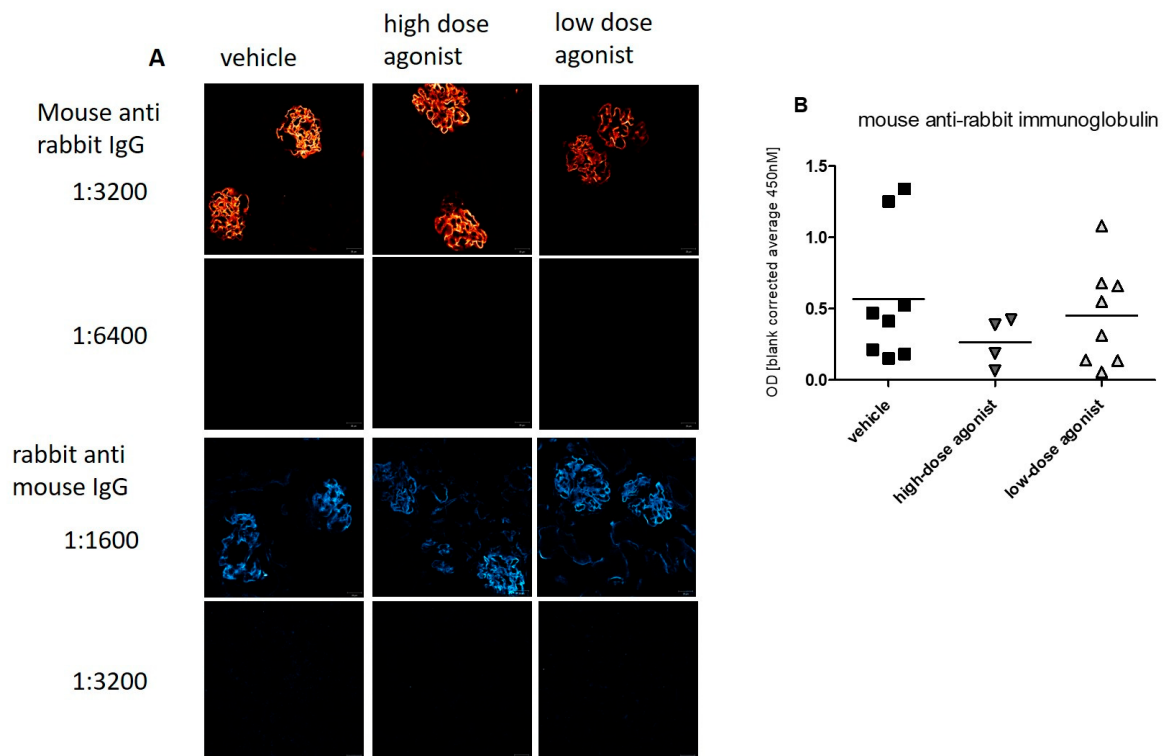

**Figure S3.** Treatment of NTS mice with EP4 antagonist or agonist does not affect IgG deposition in the kidney. Mouse anti-rabbit IgG serum titers were evaluated on day 14 after NTS induction (**A**). Furthermore, deposition of mouse anti-rabbit IgG and rabbit anti-mouse IgG on glomerular basal membrane was performed (**B**).

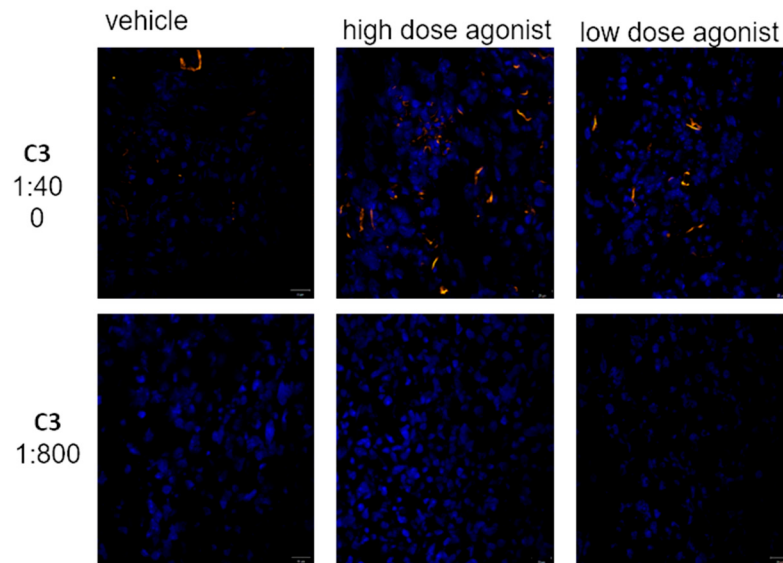

**Figure S4.** Treatment of NTS mice with EP4 agonist does not affect C3 deposition in the kidney. On day 14 after NTS induction C3 deposition was evaluated by immunofluorescence microscopy;.

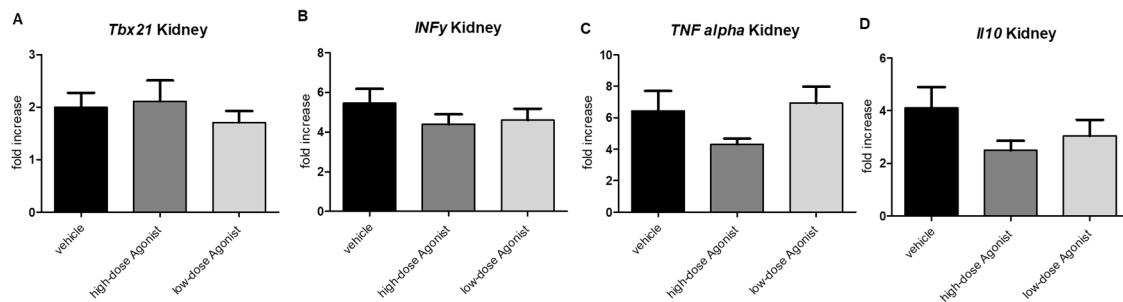

**Figure S5.** Cytokine mRNA expression in the kidney. Fourteen days after NTS induction RT PCR was performed to evaluate cytokine expression in the kidney (A–D) in mice treated with vehicle ( $n = 6$ ), high-dose EP4 receptor agonist ( $n = 3-4$ ), low-dose EP4 receptor agonist ( $n = 7-8$ ) and compared to healthy mice kidneys ( $n = 3$ ).

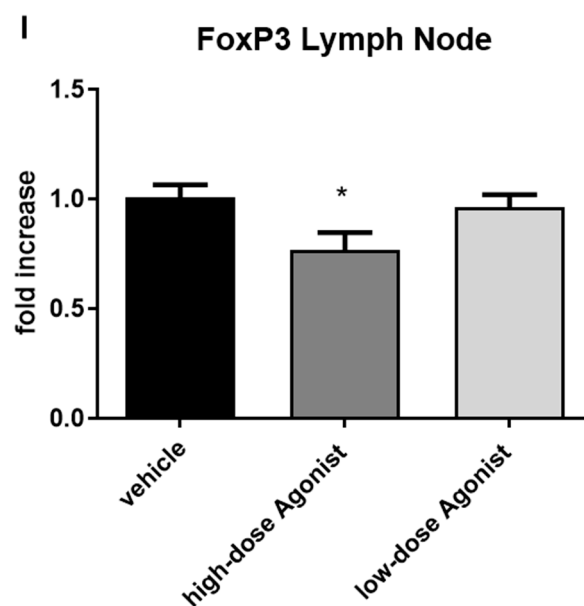

**Figure S6.** Proliferation of tubular cells in vivo. (A) Fourteen days after the induction of NTS mice treated with a high- (25  $\mu\text{g}/\text{mouse}/\text{day}$ ;  $n = 7$ ) or low-dose (7  $\mu\text{g}/\text{mouse}/\text{day}$ ;  $n = 6$ ) of the EP4 receptor

agonist (Cayman Chemicals, L-902,688) or vehicle ( $n = 9$ ) were evaluated for the number of PCNA<sup>+</sup> tubular cells. \* $p < 0.05$ .

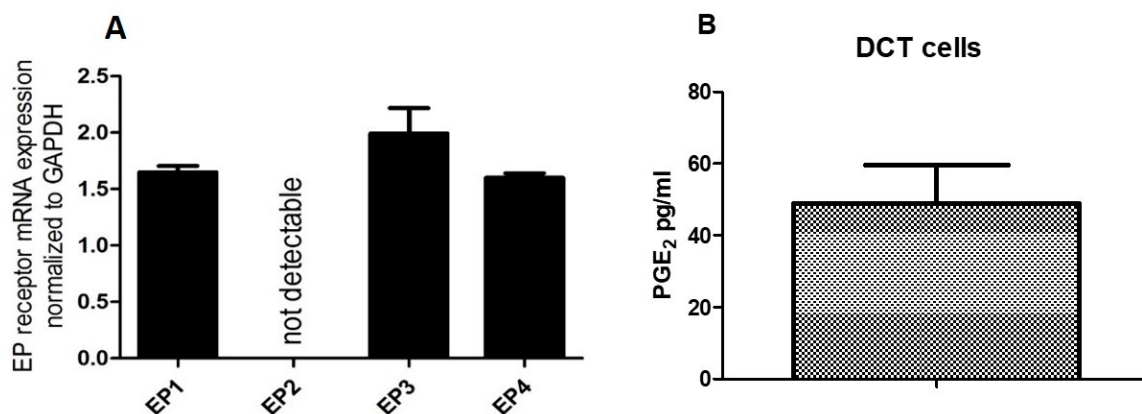

**Figure S7.** EP4 is expressed by Distal Convoluted Tubular cells. EP1, 2, 3 and 4 receptor mRNA expression was evaluated on DCT cells (A). PGE<sub>2</sub> production of DCT cells after 72 h of incubation in starving medium was evaluated by RIA ( $48.9 \pm 10.6$  pg/mL) (B). Experiments were performed in duplicates and in total at least five different experiments were performed.
